# Supplementary material
Source: PubMed Central journal article supplement (PMC6084846)
Supplement: EHP2663.s001.acco.pdf [file EHP2663.s001.acco.pdf]

**Note to readers with disabilities:** *EHP* strives to ensure that all journal content is accessible to all readers. However, some figures and Supplemental Material published in *EHP* articles may not conform to [508 standards](#) due to the complexity of the information being presented. If you need assistance accessing journal content, please contact [ehp508@niehs.nih.gov](mailto:ehp508@niehs.nih.gov). Our staff will work with you to assess and meet your accessibility needs within 3 working days.

### **Supplemental Material**

#### **Spatial Modeling to Identify Sociodemographic Predictors of Hydraulic Fracturing Wastewater Injection Wells in Ohio Census Block Groups**

Genevieve S. Silva, Joshua L. Warren, and Nicole C. Deziel

#### **Table of Contents**

**Table S1.** Odds ratios (posterior means) and 95% credible intervals for the associations between sociodemographic factors and presence of Class II injection wells at the block group level in Ohio (2010-2016), based on Sparse SGLMM ( $q = 250$ ) using three new outcome definitions in addition to our primary definition, “Within Block Group (BG)”.

**Table S2.** Odds ratios (posterior means) and 95% credible intervals for the associations between sociodemographic factors and presence of Class II injection wells at the block group level in Ohio (2010-2016) based on Sparse SGLMM using three different values of  $q$ . (Block groups with CII injection well,  $n = 156$ ; block groups without CII injection well,  $n = 9,049$ ).

**Table S1.** Odds ratios (posterior means) and 95% credible intervals for the associations between sociodemographic factors and presence of Class II injection wells at the block group level in Ohio (2010-2016), based on Sparse SGLMM ( $q = 250$ ) using three new outcome definitions in addition to our primary definition, “Within Block Group (BG)”.

| <b>Characteristic</b>                                  | <b>≤ 5 km BG Centroid</b> | <b>High Volume BG</b> | <b>Within Rural BG</b> | <b>Within BG</b>      |
|--------------------------------------------------------|---------------------------|-----------------------|------------------------|-----------------------|
| N with; without CII injection well in group            | N=718; 8,487              | N=90; 0               | N=152; 3,085           | N=156; 9,049          |
| UNG Well (per 1 count)                                 | 0.905 (0.856, 0.944)*     | 0.976 (0.947, 0.996)* | 0.967 (0.938, 0.989)*  | 0.967 (0.939, 0.989)* |
| Median Age (per 1 year)                                | 0.994 (0.979, 1.01)       | 1.00 (0.970, 1.04)    | 0.987 (0.960, 1.02)    | 0.984 (0.959, 1.01)   |
| % ≥ High School Educated (per 1%)                      | 1.01 (0.995, 1.03)        | 1.00 (0.972, 1.03)    | 1.02 (0.988, 1.04)     | 1.01 (0.988, 1.04)    |
| Median Income (per \$10,000)                           | 0.812 (0.750, 0.885)*     | 0.934 (0.783, 1.10)   | 0.793 (0.669, 0.931)*  | 0.837 (0.719, 0.961)* |
| % White (per 1%)                                       | 1.03 (1.02, 1.03)*        | 1.02 (0.983, 1.06)    | 1.01 (0.982, 1.05)     | 1.02 (0.990, 1.05)    |
| % Voter Turnout (per 1%)                               | 0.974 (0.954, 0.993)*     | 0.974 (0.934, 1.02)   | 1.00 (0.966, 1.05)     | 0.994 (0.959, 1.03)   |
| Population Density (per 1,000 person/mi <sup>2</sup> ) | 0.949 (0.894, 1.01)       | 0.037 (0.007, 0.096)* | 0.011 (0.001, 0.038)*  | 0.030 (0.008, 0.072)* |
| Water Area (per 1 km <sup>2</sup> )                    | 0.681 (0.535, 0.839)*     | 0.928 (0.780, 1.01)   | 0.905 (0.757, 1.00)    | 0.904 (0.761, 1.00)   |
| Utica Shale (Yes vs. No)                               | 33.7 (18.3, 56.2)*        | 10.1 (4.25, 20.7)*    | 6.38 (3.13, 11.7)*     | 5.06 (2.76, 8.36)*    |
| Marcellus Shale (Yes vs. No)                           | 3.74 (2.21, 5.85)*        | 1.37 (0.577, 2.78)    | 2.08 (0.946, 3.96)     | 2.58 (1.29, 4.45)*    |

\*Indicates statistical significance (95% credible interval does not include 1.0)

All posterior summaries were generated using models that included all of the predictors shown in Table S1.

Sparse SGLMM: sparse version of spatial generalized linear mixed model,  $q$ : model complexity, UNG: hydraulically-fractured unconventional natural gas well.

≤ 5 km BG centroid: CII injection well present within a 5-kilometer buffer region from the block group’s centroid, high volume BG: block group with CII injection well(s) receiving a cumulative volume ≥ 141,367 barrels from quarter 3, 2010 to quarter 1, 2016, rural BG: block group with population density < 1,000 person/mile<sup>2</sup>, within BG: the primary model.

**Table S2.** Odds ratios (posterior means) and 95% credible intervals for the associations between sociodemographic factors and presence of Class II injection wells at the block group level in Ohio (2010-2016) based on Sparse SGLMM using three different values of  $q$ . (Block groups with CII injection well,  $n = 156$ ; block groups without CII injection well,  $n = 9,049$ )

| <b>Characteristic</b>                                  | <b>Sparse SGLMM (<math>q=50</math>)<br/>(DIC: 1085.62, <math>p_D</math>: 19.99)</b> | <b>Sparse SGLMM (<math>q=150</math>)<br/>(DIC: 1057.85, <math>p_D</math>: 35.12)</b> | <b>Sparse SGLMM (<math>q=250</math>)<br/>(DIC: 1049.71, <math>p_D</math>: 47.50)</b> |
|--------------------------------------------------------|-------------------------------------------------------------------------------------|--------------------------------------------------------------------------------------|--------------------------------------------------------------------------------------|
| UNG Well (per 1 count)                                 | 0.967 (0.940, 0.986)*                                                               | 0.970 (0.944, 0.990)*                                                                | 0.967 (0.939, 0.989)*                                                                |
| Median Age (per 1 year)                                | 0.984 (0.961, 1.01)                                                                 | 0.983 (0.958, 1.007)                                                                 | 0.984 (0.959, 1.01)                                                                  |
| % $\geq$ High School Educated (per 1%)                 | 1.01 (0.990, 1.04)                                                                  | 1.01 (0.988, 1.03)                                                                   | 1.01 (0.988, 1.04)                                                                   |
| Median Income (per \$10,000)                           | 0.839 (0.720, 0.957)*                                                               | 0.845 (0.727, 0.968)*                                                                | 0.837 (0.719, 0.961)*                                                                |
| % White (per 1%)                                       | 1.01 (0.987, 1.04)                                                                  | 1.02 (0.990, 1.05)                                                                   | 1.02 (0.990, 1.05)                                                                   |
| % Voter Turnout (per 1%)                               | 0.995 (0.963, 1.03)                                                                 | 0.996 (0.963, 1.03)                                                                  | 0.994 (0.959, 1.03)                                                                  |
| Population Density (per 1,000 person/mi <sup>2</sup> ) | 0.021 (0.005, 0.050)*                                                               | 0.028 (0.008, 0.067)*                                                                | 0.030 (0.008, 0.072)*                                                                |
| Water Area (per 1 km <sup>2</sup> )                    | 0.919 (0.782, 1.00)                                                                 | 0.912 (0.763, 1.00)                                                                  | 0.904 (0.761, 1.00)                                                                  |
| Utica Shale (Yes vs. No)                               | 5.39 (3.19, 8.27)*                                                                  | 4.85 (2.70, 7.92)*                                                                   | 5.06 (2.76, 8.36)*                                                                   |
| Marcellus Shale (Yes vs. No)                           | 1.98 (1.18, 3.03)*                                                                  | 2.59 (1.44, 4.47)*                                                                   | 2.58 (1.29, 4.45)*                                                                   |

\*Indicates statistical significance (95% credible interval does not include 1.0)

All posterior summaries were generated using models that included all of the predictors shown in Table S2. Estimates with  $q = 250$  represent the primary model.

Sparse SGLMM: sparse version of spatial generalized linear mixed model, DIC: deviance information criterion,  $p_D$ : effective number of parameters,  $q$ : model complexity, UNG: hydraulically-fractured unconventional natural gas well.
